# Supplementary material for: Computational Investigation of Anticorrosion Properties in Ethyl 4-[(E)-(2-Hydroxy-4-Methoxyphenyl) Methyleneamino] Benzoate and Its Pyrrole Substituted Variant on mild steel
Source: Research Square preprint supplement (doi:10.21203/rs.3.rs-6757056/v1), 2025-06-11
Supplement: Supplementary file 1 [file 89c2b58cc0296ac4e75f344e.docx]

| **Table S2: Radial distribution function data for EMAB and its derivative (the adsorption distance from the metal surface r, for EMAB and its derivative range from 0.01 to 10.01 Å** | | | | | | |
| --- | --- | --- | --- | --- | --- | --- |
|  |  |  |  |  |  |  |
| **EMAB** | |  | **Pyrrole Derivative** | | |  |
| **r(Å)** | **g(r)** |  | **r(Å)** | **g(r)** |  |  |
| 0.01 | 0 |  | 0.01 | 0 |  |  |
| 0.03 | 0 |  | 0.03 | 0 |  |  |
| 0.05 | 0 |  | 0.05 | 0 |  |  |
| 0.07 | 0 |  | 0.07 | 0 |  |  |
| 0.09 | 0 |  | 0.09 | 0 |  |  |
| 0.11 | 0 |  | 0.11 | 0 |  |  |
| 0.13 | 0 |  | 0.13 | 0 |  |  |
| 0.15 | 0 |  | 0.15 | 0 |  |  |
| 0.17 | 0 |  | 0.17 | 0 |  |  |
| 0.19 | 0 |  | 0.19 | 0 |  |  |
| 0.21 | 0 |  | 0.21 | 0 |  |  |
| 0.23 | 0 |  | 0.23 | 0 |  |  |
| 0.25 | 0 |  | 0.25 | 0 |  |  |
| 0.27 | 0 |  | 0.27 | 0 |  |  |
| 0.29 | 0 |  | 0.29 | 0 |  |  |
| 0.31 | 0 |  | 0.31 | 0 |  |  |
| 0.33 | 0 |  | 0.33 | 0 |  |  |
| 0.35 | 0 |  | 0.35 | 0 |  |  |
| 0.37 | 0 |  | 0.37 | 0 |  |  |
| 0.39 | 0 |  | 0.39 | 0 |  |  |
| 0.41 | 0 |  | 0.41 | 0 |  |  |
| 0.43 | 0 |  | 0.43 | 0 |  |  |
| 0.45 | 0 |  | 0.45 | 0 |  |  |
| 0.47 | 0 |  | 0.47 | 0 |  |  |
| 0.49 | 0 |  | 0.49 | 0 |  |  |
| 0.51 | 0 |  | 0.51 | 0 |  |  |
| 0.53 | 0 |  | 0.53 | 0 |  |  |
| 0.55 | 0 |  | 0.55 | 0 |  |  |
| 0.57 | 0 |  | 0.57 | 0 |  |  |
| 0.59 | 0 |  | 0.59 | 0 |  |  |
| 0.61 | 0 |  | 0.61 | 0 |  |  |
| 0.63 | 0 |  | 0.63 | 0 |  |  |
| 0.65 | 0 |  | 0.65 | 0 |  |  |
| 0.67 | 0 |  | 0.67 | 0 |  |  |
| 0.69 | 0 |  | 0.69 | 0 |  |  |
| 0.71 | 0 |  | 0.71 | 0 |  |  |
| 0.73 | 0 |  | 0.73 | 0 |  |  |
| 0.75 | 0 |  | 0.75 | 0 |  |  |
| 0.77 | 0 |  | 0.77 | 0 |  |  |
| 0.79 | 0 |  | 0.79 | 0 |  |  |
| 0.81 | 0 |  | 0.81 | 0 |  |  |
| 0.83 | 0 |  | 0.83 | 0 |  |  |
| 0.85 | 0 |  | 0.85 | 0 |  |  |
| 0.87 | 0 |  | 0.87 | 3.733286 |  |  |
| 0.89 | 16.9219 |  | 0.89 | 21.40434 |  |  |
| 0.91 | 21.58171 |  | 0.91 | 17.06155 |  |  |
| 0.93 | 15.49761 |  | 0.93 | 26.13703 |  |  |
| 0.95 | 24.75329 |  | 0.95 | 31.31018 |  |  |
| 0.97 | 47.48618 |  | 0.97 | 63.06803 |  |  |
| 0.99 | 31.91089 |  | 0.99 | 66.31191 |  |  |
| 1.01 | 52.5594 |  | 1.01 | 77.56217 |  |  |
| 1.03 | 105.2878 |  | 1.03 | 109.2055 |  |  |
| 1.05 | 186.4199 |  | 1.05 | 217.8593 |  |  |
| 1.07 | 374.6426 |  | 1.07 | 291.2398 |  |  |
| 1.09 | 470.0791 |  | 1.09 | 437.6244 |  |  |
| 1.11 | 489.5558 |  | 1.11 | 337.1386 |  |  |
| 1.13 | 339.4139 |  | 1.13 | 250.0685 |  |  |
| 1.15 | 243.2495 |  | 1.15 | 166.6621 |  |  |
| 1.17 | 124.0302 |  | 1.17 | 101.1492 |  |  |
| 1.19 | 82.03427 |  | 1.19 | 65.85043 |  |  |
| 1.21 | 64.08624 |  | 1.21 | 48.25121 |  |  |
| 1.23 | 26.57962 |  | 1.23 | 35.48809 |  |  |
| 1.25 | 25.7359 |  | 1.25 | 27.12757 |  |  |
| 1.27 | 30.4721 |  | 1.27 | 35.03987 |  |  |
| 1.29 | 53.69922 |  | 1.29 | 32.26371 |  |  |
| 1.31 | 65.09012 |  | 1.31 | 65.86547 |  |  |
| 1.33 | 133.8722 |  | 1.33 | 113.4216 |  |  |
| 1.35 | 196.1285 |  | 1.35 | 200.0152 |  |  |
| 1.37 | 314.2326 |  | 1.37 | 280.0354 |  |  |
| 1.39 | 307.5676 |  | 1.39 | 326.1494 |  |  |
| 1.41 | 303.3992 |  | 1.41 | 294.221 |  |  |
| 1.43 | 218.4977 |  | 1.43 | 215.573 |  |  |
| 1.45 | 153.0086 |  | 1.45 | 129.026 |  |  |
| 1.47 | 90.97821 |  | 1.47 | 126.8467 |  |  |
| 1.49 | 80.50207 |  | 1.49 | 71.27838 |  |  |
| 1.51 | 41.15145 |  | 1.51 | 37.18004 |  |  |
| 1.53 | 30.53916 |  | 1.53 | 35.00723 |  |  |
| 1.55 | 20.45735 |  | 1.55 | 14.11434 |  |  |
| 1.57 | 10.87607 |  | 1.57 | 12.61062 |  |  |
| 1.59 | 14.13892 |  | 1.59 | 1.117761 |  |  |
| 1.61 | 12.0661 |  | 1.61 | 5.450816 |  |  |
| 1.63 | 6.726752 |  | 1.63 | 3.190726 |  |  |
| 1.65 | 4.923502 |  | 1.65 | 5.189741 |  |  |
| 1.67 | 6.408376 |  | 1.67 | 5.066181 |  |  |
| 1.69 | 26.59479 |  | 1.69 | 21.76672 |  |  |
| 1.71 | 25.97633 |  | 1.71 | 12.56305 |  |  |
| 1.73 | 26.8721 |  | 1.73 | 20.77182 |  |  |
| 1.75 | 59.81762 |  | 1.75 | 29.52691 |  |  |
| 1.77 | 55.6211 |  | 1.77 | 29.76539 |  |  |
| 1.79 | 58.5686 |  | 1.79 | 28.22203 |  |  |
| 1.81 | 39.55146 |  | 1.81 | 30.18946 |  |  |
| 1.83 | 40.02588 |  | 1.83 | 14.34469 |  |  |
| 1.85 | 37.85963 |  | 1.85 | 22.29282 |  |  |
| 1.87 | 33.22095 |  | 1.87 | 16.16187 |  |  |
| 1.89 | 37.52491 |  | 1.89 | 12.6573 |  |  |
| 1.91 | 33.06886 |  | 1.91 | 20.13963 |  |  |
| 1.93 | 16.79328 |  | 1.93 | 11.37946 |  |  |
| 1.95 | 18.80066 |  | 1.95 | 16.34928 |  |  |
| 1.97 | 18.42086 |  | 1.97 | 20.38782 |  |  |
| 1.99 | 37.23319 |  | 1.99 | 24.26152 |  |  |
| 2.01 | 49.76717 |  | 2.01 | 38.46944 |  |  |
| 2.03 | 43.37011 |  | 2.03 | 42.51527 |  |  |
| 2.05 | 71.23439 |  | 2.05 | 53.79324 |  |  |
| 2.07 | 70.9073 |  | 2.07 | 58.69415 |  |  |
| 2.09 | 96.15194 |  | 2.09 | 71.80851 |  |  |
| 2.11 | 99.35578 |  | 2.11 | 86.95634 |  |  |
| 2.13 | 107.3471 |  | 2.13 | 99.65668 |  |  |
| 2.15 | 105.3592 |  | 2.15 | 102.0905 |  |  |
| 2.17 | 93.93745 |  | 2.17 | 103.2178 |  |  |
| 2.19 | 103.4089 |  | 2.19 | 103.1088 |  |  |
| 2.21 | 71.35644 |  | 2.21 | 117.4512 |  |  |
| 2.23 | 65.5898 |  | 2.23 | 96.60178 |  |  |
| 2.25 | 60.01601 |  | 2.25 | 83.72829 |  |  |
| 2.27 | 55.49471 |  | 2.27 | 91.03375 |  |  |
| 2.29 | 63.04986 |  | 2.29 | 64.66308 |  |  |
| 2.31 | 64.47482 |  | 2.31 | 74.66916 |  |  |
| 2.33 | 85.59432 |  | 2.33 | 68.18764 |  |  |
| 2.35 | 89.80711 |  | 2.35 | 77.77752 |  |  |
| 2.37 | 115.344 |  | 2.37 | 85.02297 |  |  |
| 2.39 | 128.2837 |  | 2.39 | 95.47899 |  |  |
| 2.41 | 141.5492 |  | 2.41 | 108.0103 |  |  |
| 2.43 | 133.1753 |  | 2.43 | 108.6325 |  |  |
| 2.45 | 104.9568 |  | 2.45 | 93.68441 |  |  |
| 2.47 | 102.5316 |  | 2.47 | 94.95251 |  |  |
| 2.49 | 95.8466 |  | 2.49 | 80.21591 |  |  |
| 2.51 | 78.01337 |  | 2.51 | 69.97191 |  |  |
| 2.53 | 60.72983 |  | 2.53 | 69.31148 |  |  |
| 2.55 | 54.97098 |  | 2.55 | 48.23799 |  |  |
| 2.57 | 54.79522 |  | 2.57 | 52.6242 |  |  |
| 2.59 | 57.28262 |  | 2.59 | 42.1257 |  |  |
| 2.61 | 44.60175 |  | 2.61 | 35.26019 |  |  |
| 2.63 | 46.50986 |  | 2.63 | 33.90887 |  |  |
| 2.65 | 48.3555 |  | 2.65 | 45.47089 |  |  |
| 2.67 | 55.78168 |  | 2.67 | 45.58502 |  |  |
| 2.69 | 43.84074 |  | 2.69 | 49.20541 |  |  |
| 2.71 | 54.14714 |  | 2.71 | 39.24718 |  |  |
| 2.73 | 38.36886 |  | 2.73 | 45.87826 |  |  |
| 2.75 | 47.26599 |  | 2.75 | 45.9607 |  |  |
| 2.77 | 46.58592 |  | 2.77 | 40.87995 |  |  |
| 2.79 | 44.1984 |  | 2.79 | 43.20018 |  |  |
| 2.81 | 37.91285 |  | 2.81 | 36.5035 |  |  |
| 2.83 | 36.26309 |  | 2.83 | 34.22519 |  |  |
| 2.85 | 31.35519 |  | 2.85 | 28.52799 |  |  |
| 2.87 | 23.3254 |  | 2.87 | 29.16099 |  |  |
| 2.89 | 26.21349 |  | 2.89 | 23.00702 |  |  |
| 2.91 | 24.79912 |  | 2.91 | 23.69297 |  |  |
| 2.93 | 16.13433 |  | 2.93 | 24.68728 |  |  |
| 2.95 | 16.94316 |  | 2.95 | 20.45708 |  |  |
| 2.97 | 12.66344 |  | 2.97 | 16.97892 |  |  |
| 2.99 | 11.99481 |  | 2.99 | 14.85603 |  |  |
| 3.01 | 9.863283 |  | 3.01 | 10.91647 |  |  |
| 3.03 | 12.16688 |  | 3.03 | 16.31315 |  |  |
| 3.05 | 15.85035 |  | 3.05 | 11.54333 |  |  |
| 3.07 | 13.7482 |  | 3.07 | 14.99134 |  |  |
| 3.09 | 8.423259 |  | 3.09 | 12.13429 |  |  |
| 3.11 | 12.4729 |  | 3.11 | 12.56305 |  |  |
| 3.13 | 9.577568 |  | 3.13 | 13.55678 |  |  |
| 3.15 | 10.80724 |  | 3.15 | 12.24601 |  |  |
| 3.17 | 10.22666 |  | 3.17 | 14.90407 |  |  |
| 3.19 | 9.220673 |  | 3.19 | 13.88469 |  |  |
| 3.21 | 12.14151 |  | 3.21 | 15.35767 |  |  |
| 3.23 | 10.27853 |  | 3.23 | 18.68923 |  |  |
| 3.25 | 14.8056 |  | 3.25 | 18.45992 |  |  |
| 3.27 | 14.62505 |  | 3.27 | 21.40607 |  |  |
| 3.29 | 23.11644 |  | 3.29 | 24.54051 |  |  |
| 3.31 | 19.16755 |  | 3.31 | 24.76069 |  |  |
| 3.33 | 30.62315 |  | 3.33 | 21.66098 |  |  |
| 3.35 | 25.48092 |  | 3.35 | 26.94274 |  |  |
| 3.37 | 34.62165 |  | 3.37 | 24.3845 |  |  |
| 3.39 | 35.76953 |  | 3.39 | 27.29425 |  |  |
| 3.41 | 31.89291 |  | 3.41 | 27.70408 |  |  |
| 3.43 | 33.04121 |  | 3.43 | 25.22021 |  |  |
| 3.45 | 25.15136 |  | 3.45 | 19.7055 |  |  |
| 3.47 | 22.26472 |  | 3.47 | 22.06056 |  |  |
| 3.49 | 19.07556 |  | 3.49 | 20.88042 |  |  |
| 3.51 | 20.30948 |  | 3.51 | 17.43199 |  |  |
| 3.53 | 16.85285 |  | 3.53 | 13.15304 |  |  |
| 3.55 | 15.95441 |  | 3.55 | 15.696 |  |  |
| 3.57 | 17.17848 |  | 3.57 | 15.07718 |  |  |
| 3.59 | 19.76109 |  | 3.59 | 14.47114 |  |  |
| 3.61 | 29.82839 |  | 3.61 | 16.26277 |  |  |
| 3.63 | 29.8397 |  | 3.63 | 19.08642 |  |  |
| 3.65 | 30.51973 |  | 3.65 | 29.48335 |  |  |
| 3.67 | 37.15446 |  | 3.67 | 26.01581 |  |  |
| 3.69 | 29.20534 |  | 3.69 | 29.8853 |  |  |
| 3.71 | 35.38374 |  | 3.71 | 29.15334 |  |  |
| 3.73 | 29.54576 |  | 3.73 | 27.21667 |  |  |
| 3.75 | 29.54918 |  | 3.75 | 27.52998 |  |  |
| 3.77 | 25.77842 |  | 3.77 | 25.64808 |  |  |
| 3.79 | 26.44025 |  | 3.79 | 23.21408 |  |  |
| 3.81 | 22.77754 |  | 3.81 | 22.38699 |  |  |
| 3.83 | 21.93108 |  | 3.83 | 17.72304 |  |  |
| 3.85 | 23.51247 |  | 3.85 | 18.49261 |  |  |
| 3.87 | 22.67341 |  | 3.87 | 17.9246 |  |  |
| 3.89 | 22.73614 |  | 3.89 | 17.55402 |  |  |
| 3.91 | 19.28926 |  | 3.91 | 15.34166 |  |  |
| 3.93 | 22.85426 |  | 3.93 | 14.45406 |  |  |
| 3.95 | 20.04606 |  | 3.95 | 16.30032 |  |  |
| 3.97 | 14.4582 |  | 3.97 | 14.70215 |  |  |
| 3.99 | 13.7523 |  | 3.99 | 15.26513 |  |  |
| 4.01 | 17.22773 |  | 4.01 | 15.11324 |  |  |
| 4.03 | 17.05716 |  | 4.03 | 13.91964 |  |  |
| 4.05 | 15.25468 |  | 4.05 | 13.61022 |  |  |
| 4.07 | 13.21699 |  | 4.07 | 14.50034 |  |  |
| 4.09 | 14.69066 |  | 4.09 | 14.02102 |  |  |
| 4.11 | 10.8449 |  | 4.11 | 14.21947 |  |  |
| 4.13 | 17.02701 |  | 4.13 | 14.08208 |  |  |
| 4.15 | 17.90104 |  | 4.15 | 16.57193 |  |  |
| 4.17 | 16.18802 |  | 4.17 | 17.87593 |  |  |
| 4.19 | 19.34242 |  | 4.19 | 17.38376 |  |  |
| 4.21 | 15.88187 |  | 4.21 | 18.33503 |  |  |
| 4.23 | 17.72976 |  | 4.23 | 17.53034 |  |  |
| 4.25 | 17.31592 |  | 4.25 | 17.83508 |  |  |
| 4.27 | 17.39915 |  | 4.27 | 16.11854 |  |  |
| 4.29 | 19.17952 |  | 4.29 | 17.3505 |  |  |
| 4.31 | 19.24247 |  | 4.31 | 16.27711 |  |  |
| 4.33 | 14.53715 |  | 4.33 | 18.53862 |  |  |
| 4.35 | 16.76506 |  | 4.35 | 15.97914 |  |  |
| 4.37 | 15.67607 |  | 4.37 | 15.98118 |  |  |
| 4.39 | 14.83803 |  | 4.39 | 13.63647 |  |  |
| 4.41 | 17.23096 |  | 4.41 | 16.4191 |  |  |
| 4.43 | 13.88826 |  | 4.43 | 14.97525 |  |  |
| 4.45 | 12.63553 |  | 4.45 | 11.98691 |  |  |
| 4.47 | 14.31167 |  | 4.47 | 12.16274 |  |  |
| 4.49 | 14.62772 |  | 4.49 | 12.47514 |  |  |
| 4.51 | 15.8163 |  | 4.51 | 12.22581 |  |  |
| 4.53 | 17.20109 |  | 4.53 | 16.11156 |  |  |
| 4.55 | 16.18691 |  | 4.55 | 15.69724 |  |  |
| 4.57 | 15.40372 |  | 4.57 | 14.88362 |  |  |
| 4.59 | 14.63353 |  | 4.59 | 16.90026 |  |  |
| 4.61 | 19.1322 |  | 4.61 | 15.69019 |  |  |
| 4.63 | 18.75884 |  | 4.63 | 16.47769 |  |  |
| 4.65 | 17.35797 |  | 4.65 | 17.25108 |  |  |
| 4.67 | 17.00473 |  | 4.67 | 17.62192 |  |  |
| 4.69 | 16.65688 |  | 4.69 | 16.05878 |  |  |
| 4.71 | 16.71713 |  | 4.71 | 15.79531 |  |  |
| 4.73 | 16.17664 |  | 4.73 | 14.14634 |  |  |
| 4.75 | 16.6348 |  | 4.75 | 15.02942 |  |  |
| 4.77 | 16.4956 |  | 4.77 | 15.15205 |  |  |
| 4.79 | 16.74761 |  | 4.79 | 15.51843 |  |  |
| 4.81 | 15.83613 |  | 4.81 | 15.14537 |  |  |
| 4.83 | 14.93915 |  | 4.83 | 15.50472 |  |  |
| 4.85 | 17.47551 |  | 4.85 | 15.01671 |  |  |
| 4.87 | 15.44833 |  | 4.87 | 15.13192 |  |  |
| 4.89 | 14.76165 |  | 4.89 | 15.4811 |  |  |
| 4.91 | 12.41759 |  | 4.91 | 12.42485 |  |  |
| 4.93 | 15.07459 |  | 4.93 | 10.11518 |  |  |
| 4.95 | 11.67065 |  | 4.95 | 13.37814 |  |  |
| 4.97 | 10.85335 |  | 4.97 | 13.6139 |  |  |
| 4.99 | 12.02262 |  | 4.99 | 9.759906 |  |  |
| 5.01 | 12.63888 |  | 5.01 | 10.80797 |  |  |
| 5.03 | 13.59816 |  | 5.03 | 8.376712 |  |  |
| 5.05 | 11.21302 |  | 5.05 | 8.753719 |  |  |
| 5.07 | 8.865022 |  | 5.07 | 8.135122 |  |  |
| 5.09 | 10.00272 |  | 5.09 | 6.108024 |  |  |
| 5.11 | 9.069005 |  | 5.11 | 10.28088 |  |  |
| 5.13 | 6.621485 |  | 5.13 | 8.804961 |  |  |
| 5.15 | 6.401691 |  | 5.15 | 10.44143 |  |  |
| 5.17 | 7.689574 |  | 5.17 | 6.977682 |  |  |
| 5.19 | 5.805758 |  | 5.19 | 6.60928 |  |  |
| 5.21 | 7.901169 |  | 5.21 | 8.016109 |  |  |
| 5.23 | 8.657611 |  | 5.23 | 9.297955 |  |  |
| 5.25 | 6.322249 |  | 5.25 | 8.304524 |  |  |
| 5.27 | 6.596115 |  | 5.27 | 7.73287 |  |  |
| 5.29 | 6.386666 |  | 5.29 | 8.785293 |  |  |
| 5.31 | 3.961654 |  | 5.31 | 6.013268 |  |  |
| 5.33 | 4.561096 |  | 5.33 | 4.476169 |  |  |
| 5.35 | 5.307585 |  | 5.35 | 5.72623 |  |  |
| 5.37 | 4.958234 |  | 5.37 | 5.487668 |  |  |
| 5.39 | 6.459477 |  | 5.39 | 4.668873 |  |  |
| 5.41 | 4.885185 |  | 5.41 | 4.055114 |  |  |
| 5.43 | 5.758502 |  | 5.43 | 5.750425 |  |  |
| 5.45 | 5.265028 |  | 5.45 | 4.566638 |  |  |
| 5.47 | 8.063892 |  | 5.47 | 6.044407 |  |  |
| 5.49 | 5.485076 |  | 5.49 | 5.250392 |  |  |
| 5.51 | 6.034014 |  | 5.51 | 6.236199 |  |  |
| 5.53 | 7.59764 |  | 5.53 | 4.805089 |  |  |
| 5.55 | 7.542981 |  | 5.55 | 5.137484 |  |  |
| 5.57 | 6.91284 |  | 5.57 | 5.282822 |  |  |
| 5.59 | 8.722317 |  | 5.59 | 7.234604 |  |  |
| 5.61 | 9.937976 |  | 5.61 | 8.081001 |  |  |
| 5.63 | 9.021709 |  | 5.63 | 8.201994 |  |  |
| 5.65 | 10.0777 |  | 5.65 | 8.498118 |  |  |
| 5.67 | 8.199956 |  | 5.67 | 9.756752 |  |  |
| 5.69 | 8.556434 |  | 5.69 | 8.815465 |  |  |
| 5.71 | 10.96335 |  | 5.71 | 8.753819 |  |  |
| 5.73 | 8.981737 |  | 5.73 | 10.0699 |  |  |
| 5.75 | 7.973371 |  | 5.75 | 10.17091 |  |  |
| 5.77 | 9.394466 |  | 5.77 | 9.081981 |  |  |
| 5.79 | 7.863584 |  | 5.79 | 7.502073 |  |  |
| 5.81 | 8.86846 |  | 5.81 | 7.450513 |  |  |
| 5.83 | 6.704382 |  | 5.83 | 7.316342 |  |  |
| 5.85 | 5.353007 |  | 5.85 | 6.770965 |  |  |
| 5.87 | 6.09463 |  | 5.87 | 7.955069 |  |  |
| 5.89 | 7.212455 |  | 5.89 | 6.434946 |  |  |
| 5.91 | 6.779952 |  | 5.91 | 5.420611 |  |  |
| 5.93 | 7.877855 |  | 5.93 | 6.026988 |  |  |
| 5.95 | 5.427005 |  | 5.95 | 6.864564 |  |  |
| 5.97 | 7.271182 |  | 5.97 | 6.422214 |  |  |
| 5.99 | 6.72459 |  | 5.99 | 6.77319 |  |  |
| 6.01 | 8.535439 |  | 6.01 | 5.945838 |  |  |
| 6.03 | 6.512788 |  | 6.03 | 5.284729 |  |  |
| 6.05 | 7.446373 |  | 6.05 | 6.485105 |  |  |
| 6.07 | 5.820892 |  | 6.07 | 6.365744 |  |  |
| 6.09 | 5.421303 |  | 6.09 | 6.095423 |  |  |
| 6.11 | 7.061473 |  | 6.11 | 5.374331 |  |  |
| 6.13 | 5.350782 |  | 6.13 | 3.985689 |  |  |
| 6.15 | 5.67044 |  | 6.15 | 5.977068 |  |  |
| 6.17 | 6.103216 |  | 6.17 | 5.938382 |  |  |
| 6.19 | 5.947228 |  | 6.19 | 6.268824 |  |  |
| 6.21 | 5.677258 |  | 6.21 | 4.909532 |  |  |
| 6.23 | 5.410626 |  | 6.23 | 5.096481 |  |  |
| 6.25 | 5.261669 |  | 6.25 | 5.063916 |  |  |
| 6.27 | 5.341811 |  | 6.27 | 3.953449 |  |  |
| 6.29 | 6.098432 |  | 6.29 | 4.642592 |  |  |
| 6.31 | 5.274301 |  | 6.31 | 4.684181 |  |  |
| 6.33 | 6.021602 |  | 6.33 | 4.795678 |  |  |
| 6.35 | 8.310737 |  | 6.35 | 4.835597 |  |  |
| 6.37 | 6.276561 |  | 6.37 | 3.691012 |  |  |
| 6.39 | 5.361917 |  | 6.39 | 6.228583 |  |  |
| 6.41 | 7.068431 |  | 6.41 | 5.708349 |  |  |
| 6.43 | 5.403483 |  | 6.43 | 5.194457 |  |  |
| 6.45 | 6.873632 |  | 6.45 | 5.841542 |  |  |
| 6.47 | 7.044678 |  | 6.47 | 5.197933 |  |  |
| 6.49 | 5.091873 |  | 6.49 | 7.044471 |  |  |
| 6.51 | 6.431224 |  | 6.51 | 7.66804 |  |  |
| 6.53 | 5.029683 |  | 6.53 | 5.301663 |  |  |
| 6.55 | 5.728038 |  | 6.55 | 6.520803 |  |  |
| 6.57 | 5.79673 |  | 6.57 | 6.219298 |  |  |
| 6.59 | 5.041398 |  | 6.59 | 5.53091 |  |  |
| 6.61 | 4.295089 |  | 6.61 | 5.497491 |  |  |
| 6.63 | 4.472511 |  | 6.63 | 5.785807 |  |  |
| 6.65 | 5.860174 |  | 6.65 | 5.687157 |  |  |
| 6.67 | 4.921191 |  | 6.67 | 4.573296 |  |  |
| 6.69 | 4.692145 |  | 6.69 | 4.672271 |  |  |
| 6.71 | 5.06117 |  | 6.71 | 5.021038 |  |  |
| 6.73 | 5.228433 |  | 6.73 | 4.304944 |  |  |
| 6.75 | 4.805232 |  | 6.75 | 4.961705 |  |  |
| 6.77 | 3.314571 |  | 6.77 | 4.069257 |  |  |
| 6.79 | 4.070385 |  | 6.79 | 3.738857 |  |  |
| 6.81 | 4.624585 |  | 6.81 | 3.777861 |  |  |
| 6.83 | 5.076452 |  | 6.83 | 3.937499 |  |  |
| 6.85 | 3.999392 |  | 6.85 | 4.938343 |  |  |
| 6.87 | 3.59746 |  | 6.87 | 4.670138 |  |  |
| 6.89 | 4.423695 |  | 6.89 | 4.226379 |  |  |
| 6.91 | 5.146742 |  | 6.91 | 4.320314 |  |  |
| 6.93 | 4.744927 |  | 6.93 | 4.060048 |  |  |
| 6.95 | 5.550185 |  | 6.95 | 5.148274 |  |  |
| 6.97 | 5.058514 |  | 6.97 | 5.002435 |  |  |
| 6.99 | 5.486845 |  | 6.99 | 3.990647 |  |  |
| 7.01 | 4.546318 |  | 7.01 | 4.255438 |  |  |
| 7.03 | 4.791716 |  | 7.03 | 4.974588 |  |  |
| 7.05 | 4.764567 |  | 7.05 | 5.23068 |  |  |
| 7.07 | 4.201311 |  | 7.07 | 4.409652 |  |  |
| 7.09 | 5.244274 |  | 7.09 | 4.890749 |  |  |
| 7.11 | 5.214812 |  | 7.11 | 4.471975 |  |  |
| 7.13 | 5.273489 |  | 7.13 | 4.836027 |  |  |
| 7.15 | 3.84562 |  | 7.15 | 4.919563 |  |  |
| 7.17 | 3.476542 |  | 7.17 | 4.232539 |  |  |
| 7.19 | 4.148674 |  | 7.19 | 3.662398 |  |  |
| 7.21 | 3.781882 |  | 7.21 | 4.294426 |  |  |
| 7.23 | 4.786712 |  | 7.23 | 3.351689 |  |  |
| 7.25 | 3.995284 |  | 7.25 | 4.300932 |  |  |
| 7.27 | 3.29702 |  | 7.27 | 4.384233 |  |  |
| 7.29 | 3.36303 |  | 7.29 | 3.987997 |  |  |
| 7.31 | 3.010188 |  | 7.31 | 3.278729 |  |  |
| 7.33 | 3.326426 |  | 7.33 | 3.050483 |  |  |
| 7.35 | 3.391056 |  | 7.35 | 4.550857 |  |  |
| 7.37 | 2.467812 |  | 7.37 | 4.266065 |  |  |
| 7.39 | 3.599893 |  | 7.39 | 3.363358 |  |  |
| 7.41 | 2.359866 |  | 7.41 | 2.882041 |  |  |
| 7.43 | 2.913739 |  | 7.43 | 3.583183 |  |  |
| 7.45 | 2.656607 |  | 7.45 | 3.207573 |  |  |
| 7.47 | 3.122837 |  | 7.47 | 2.835929 |  |  |
| 7.49 | 2.38937 |  | 7.49 | 2.367461 |  |  |
| 7.51 | 3.406547 |  | 7.51 | 2.304764 |  |  |
| 7.53 | 2.206449 |  | 7.53 | 2.69124 |  |  |
| 7.55 | 3.840856 |  | 7.55 | 2.875297 |  |  |
| 7.57 | 3.196818 |  | 7.57 | 2.712186 |  |  |
| 7.59 | 2.326824 |  | 7.59 | 2.746965 |  |  |
| 7.61 | 3.626222 |  | 7.61 | 2.68375 |  |  |
| 7.63 | 3.453737 |  | 7.63 | 2.912398 |  |  |
| 7.65 | 3.206655 |  | 7.65 | 3.283482 |  |  |
| 7.67 | 3.114003 |  | 7.67 | 3.362451 |  |  |
| 7.69 | 4.004507 |  | 7.69 | 2.819343 |  |  |
| 7.71 | 3.607932 |  | 7.71 | 3.232576 |  |  |
| 7.73 | 3.065849 |  | 7.73 | 4.114422 |  |  |
| 7.75 | 2.901263 |  | 7.75 | 3.0111 |  |  |
| 7.77 | 3.700444 |  | 7.77 | 3.463684 |  |  |
| 7.79 | 2.945174 |  | 7.79 | 3.213089 |  |  |
| 7.81 | 3.369625 |  | 7.81 | 3.706266 |  |  |
| 7.83 | 3.716828 |  | 7.83 | 3.364712 |  |  |
| 7.85 | 3.335373 |  | 7.85 | 3.760306 |  |  |
| 7.87 | 4.256263 |  | 7.87 | 4.151839 |  |  |
| 7.89 | 3.30164 |  | 7.89 | 4.266998 |  |  |
| 7.91 | 4.284737 |  | 7.91 | 3.161504 |  |  |
| 7.93 | 2.984206 |  | 7.93 | 4.538618 |  |  |
| 7.95 | 3.251992 |  | 7.95 | 3.889857 |  |  |
| 7.97 | 3.517056 |  | 7.97 | 3.558951 |  |  |
| 7.99 | 2.939555 |  | 7.99 | 3.851007 |  |  |
| 8.01 | 4.039139 |  | 8.01 | 2.950927 |  |  |
| 8.03 | 4.781277 |  | 8.03 | 3.988035 |  |  |
| 8.05 | 3.378549 |  | 8.05 | 4.491528 |  |  |
| 8.07 | 3.842084 |  | 8.07 | 3.64486 |  |  |
| 8.09 | 4.369269 |  | 8.09 | 3.670038 |  |  |
| 8.11 | 3.668411 |  | 8.11 | 3.093424 |  |  |
| 8.13 | 3.109586 |  | 8.13 | 2.693445 |  |  |
| 8.15 | 3.430685 |  | 8.15 | 3.233307 |  |  |
| 8.17 | 3.413909 |  | 8.17 | 3.725523 |  |  |
| 8.19 | 2.731127 |  | 8.19 | 3.328189 |  |  |
| 8.21 | 2.187527 |  | 8.21 | 2.934677 |  |  |
| 8.23 | 2.770611 |  | 8.23 | 2.628388 |  |  |
| 8.25 | 2.822841 |  | 8.25 | 2.698697 |  |  |
| 8.27 | 2.874535 |  | 8.27 | 2.396435 |  |  |
| 8.29 | 2.990712 |  | 8.29 | 2.343767 |  |  |
| 8.31 | 3.10574 |  | 8.31 | 2.537104 |  |  |
| 8.33 | 2.575704 |  | 8.33 | 1.832615 |  |  |
| 8.35 | 2.435211 |  | 8.35 | 2.593915 |  |  |
| 8.37 | 1.722022 |  | 8.37 | 2.137832 |  |  |
| 8.39 | 2.602471 |  | 8.39 | 1.726208 |  |  |
| 8.41 | 3.095494 |  | 8.41 | 2.157498 |  |  |
| 8.43 | 1.886219 |  | 8.43 | 1.550808 |  |  |
| 8.45 | 2.06503 |  | 8.45 | 1.939239 |  |  |
| 8.47 | 1.557038 |  | 8.47 | 1.496806 |  |  |
| 8.49 | 2.169594 |  | 8.49 | 1.724987 |  |  |
| 8.51 | 1.974316 |  | 8.51 | 1.248647 |  |  |
| 8.53 | 1.903661 |  | 8.53 | 1.67001 |  |  |
| 8.55 | 1.894765 |  | 8.55 | 1.62355 |  |  |
| 8.57 | 1.885932 |  | 8.57 | 1.500554 |  |  |
| 8.59 | 1.756053 |  | 8.59 | 1.646762 |  |  |
| 8.61 | 1.506814 |  | 8.61 | 1.21981 |  |  |
| 8.63 | 1.139877 |  | 8.63 | 1.517704 |  |  |
| 8.65 | 1.910925 |  | 8.65 | 1.170788 |  |  |
| 8.67 | 1.902119 |  | 8.67 | 1.616512 |  |  |
| 8.69 | 1.775038 |  | 8.69 | 1.721341 |  |  |
| 8.71 | 1.884689 |  | 8.71 | 2.309426 |  |  |
| 8.73 | 1.993317 |  | 8.73 | 1.186507 |  |  |
| 8.75 | 1.925856 |  | 8.75 | 1.734724 |  |  |
| 8.77 | 1.858989 |  | 8.77 | 2.204452 |  |  |
| 8.79 | 1.792709 |  | 8.79 | 2.048137 |  |  |
| 8.81 | 1.151341 |  | 8.81 | 2.148072 |  |  |
| 8.83 | 1.375358 |  | 8.83 | 2.283325 |  |  |
| 8.85 | 2.053723 |  | 8.85 | 2.705973 |  |  |
| 8.87 | 2.271636 |  | 8.87 | 2.837452 |  |  |
| 8.89 | 2.487569 |  | 8.89 | 2.252608 |  |  |
| 8.91 | 2.251285 |  | 8.91 | 2.100126 |  |  |
| 8.93 | 2.185182 |  | 8.93 | 2.44509 |  |  |
| 8.95 | 1.784966 |  | 8.95 | 2.398897 |  |  |
| 8.97 | 2.554459 |  | 8.97 | 2.177487 |  |  |
| 8.99 | 1.603262 |  | 8.99 | 2.447526 |  |  |
| 9.01 | 2.09151 |  | 9.01 | 1.77529 |  |  |
| 9.03 | 2.465829 |  | 9.03 | 1.80209 |  |  |
| 9.05 | 1.9094 |  | 9.05 | 1.621621 |  |  |
| 9.07 | 2.06393 |  | 9.07 | 1.923633 |  |  |
| 9.09 | 1.784482 |  | 9.09 | 2.017776 |  |  |
| 9.11 | 1.776655 |  | 9.11 | 1.600331 |  |  |
| 9.13 | 1.876085 |  | 9.13 | 2.203538 |  |  |
| 9.15 | 1.814524 |  | 9.15 | 1.518864 |  |  |
| 9.17 | 2.444247 |  | 9.17 | 2.184356 |  |  |
| 9.19 | 1.587143 |  | 9.19 | 1.639509 |  |  |
| 9.21 | 1.632933 |  | 9.21 | 2.265366 |  |  |
| 9.23 | 1.940547 |  | 9.23 | 1.990199 |  |  |
| 9.25 | 1.723282 |  | 9.25 | 1.155935 |  |  |
| 9.27 | 1.871841 |  | 9.27 | 1.841523 |  |  |
| 9.29 | 1.60493 |  | 9.29 | 1.57166 |  |  |
| 9.31 | 1.855791 |  | 9.31 | 2.05395 |  |  |
| 9.33 | 1.899172 |  | 9.33 | 2.499632 |  |  |
| 9.35 | 1.891056 |  | 9.35 | 1.810146 |  |  |
| 9.37 | 2.086559 |  | 9.37 | 2.124288 |  |  |
| 9.39 | 1.722954 |  | 9.39 | 2.660085 |  |  |
| 9.41 | 1.867018 |  | 9.41 | 1.787135 |  |  |
| 9.43 | 1.859107 |  | 9.43 | 2.351565 |  |  |
| 9.45 | 2.101414 |  | 9.45 | 2.626414 |  |  |
| 9.47 | 1.444854 |  | 9.47 | 1.827581 |  |  |
| 9.49 | 2.232575 |  | 9.49 | 1.914018 |  |  |
| 9.51 | 1.778555 |  | 9.51 | 1.968467 |  |  |
| 9.53 | 1.820295 |  | 9.53 | 1.680183 |  |  |
| 9.55 | 1.763688 |  | 9.55 | 2.602683 |  |  |
| 9.57 | 1.951471 |  | 9.57 | 1.882152 |  |  |
| 9.59 | 1.749006 |  | 9.59 | 1.505593 |  |  |
| 9.61 | 1.741733 |  | 9.61 | 1.591129 |  |  |
| 9.63 | 1.97541 |  | 9.63 | 1.8283 |  |  |
| 9.65 | 1.535399 |  | 9.65 | 1.760038 |  |  |
| 9.67 | 1.863535 |  | 9.67 | 1.662105 |  |  |
| 9.69 | 1.522749 |  | 9.69 | 1.655251 |  |  |
| 9.71 | 1.421703 |  | 9.71 | 2.427701 |  |  |
| 9.73 | 1.887819 |  | 9.73 | 1.611821 |  |  |
| 9.75 | 1.316057 |  | 9.75 | 1.902477 |  |  |
| 9.77 | 2.012822 |  | 9.77 | 1.628254 |  |  |
| 9.79 | 1.818131 |  | 9.79 | 2.004898 |  |  |
| 9.81 | 1.578581 |  | 9.81 | 1.468185 |  |  |
| 9.83 | 1.895845 |  | 9.83 | 1.549949 |  |  |
| 9.85 | 2.486837 |  | 9.85 | 1.631039 |  |  |
| 9.87 | 1.605313 |  | 9.87 | 1.856498 |  |  |
| 9.89 | 2.101315 |  | 9.89 | 1.877887 |  |  |
| 9.91 | 1.910856 |  | 9.91 | 1.525026 |  |  |
| 9.93 | 1.631285 |  | 9.93 | 1.490231 |  |  |
| 9.95 | 1.714997 |  | 9.95 | 1.626962 |  |  |
| 9.97 | 1.708123 |  | 9.97 | 1.620441 |  |  |
| 9.99 | 1.298354 |  | 9.99 | 1.529014 |  |  |
| 10.01 | 1.516131 |  | 10.01 | 1.861335 |  |  |
