# Supplementary material for: Computational Investigation of Anticorrosion Properties in Ethyl 4-[(E)-(2-Hydroxy-4-Methoxyphenyl) Methyleneamino] Benzoate and Its Pyrrole Substituted Variant on mild steel
Source: Research Square preprint supplement (doi:10.21203/rs.3.rs-6757056/v1), 2025-06-11
Supplement: Supplementary file 2 [file d249f7814c35d668f7911f06.docx]

**Table S1: The XYZ coordinates of the Optimized structures of EMAB and its pyrrole variant**

1. **XYZ coordinates of EMAB**

C 4.805176000 1.164753000 -0.302184000

C 3.428673000 0.980929000 -0.234482000

C 2.898558000 -0.298631000 0.110992000

C 3.802043000 -1.340257000 0.377245000

C 5.173078000 -1.164008000 0.310421000

C 5.673142000 0.106266000 -0.034356000

H 5.204642000 2.135514000 -0.564094000

H 3.406518000 -2.315683000 0.642386000

H 5.834130000 -1.992104000 0.520414000

O 6.994143000 0.399884000 -0.131341000

C 7.952902000 -0.622501000 0.125768000

H 7.845481000 -1.455110000 -0.577386000

H 7.872726000 -0.994660000 1.152559000

H 8.925870000 -0.154939000 -0.013986000

O 2.630214000 2.025012000 -0.497526000

H 1.691318000 1.718615000 -0.396408000

C 1.478447000 -0.533161000 0.190444000

N 0.609126000 0.395533000 -0.033508000

H 1.163513000 -1.545280000 0.471232000

C -0.766408000 0.126771000 -0.013897000

C -1.623809000 1.111772000 0.499658000

C -1.319814000 -1.058003000 -0.529174000

C -2.994209000 0.902324000 0.538551000

C -1.192743000 2.031681000 0.876547000

C -2.691730000 -1.260786000 -0.495505000

H -0.674888000 -1.800047000 -0.985020000

C -3.542051000 -0.288907000 0.043823000

H -3.649084000 1.660337000 0.947217000

H -3.127316000 -2.168002000 -0.896191000

C -5.004122000 -0.562164000 0.050594000

O -5.510153000 -1.581835000 -0.365796000

O -5.715549000 0.457604000 0.580512000

C -7.156845000 0.302638000 0.619290000

C -7.785596000 0.641825000 -0.722175000

H -7.394456000 -0.718673000 0.922307000

H -7.475572000 0.994725000 1.399300000

H -7.460657000 -0.065091000 -1.486804000

H -8.875203000 0.588091000 -0.642896000

H -7.512009000 1.653411000 -1.031497000

1. **XYZ Coordinates of EMAB the pyrrole derivative of EMAB**

C 3.911023000 -0.900109000 0.104850000

C 2.523671000 -0.759091000 0.073225000

C 1.947306000 0.524320000 -0.133145000

C 2.816106000 1.621708000 -0.302201000

C 4.185523000 1.477797000 -0.260083000

C 4.759885000 0.201527000 -0.052748000

H 4.296638000 -1.905903000 0.221093000

H 2.384439000 2.605780000 -0.456509000

H 4.824921000 2.344457000 -0.364206000

O 1.769237000 -1.857499000 0.227315000

H 0.817729000 -1.578762000 0.162172000

C 0.519045000 0.712899000 -0.173482000

H -0.312509000 -0.268203000 -0.044665000

H 0.163215000 1.736460000 -0.339253000

C -1.696936000 -0.051136000 -0.020696000

C -2.525516000 -1.008624000 -0.625577000

C -2.285488000 1.051759000 0.622058000

C -3.903019000 -0.847418000 -0.628380000

H -2.067165000 -1.867311000 -1.101692000

C -3.664121000 1.204810000 0.625068000

H -1.661341000 1.766702000 1.145314000

C -4.486498000 0.263575000 -0.004566000

H -4.535564000 -1.582315000 -1.108328000

H -4.126290000 2.048144000 1.123557000

C -5.957594000 0.480561000 0.034368000

O -6.494505000 1.423464000 0.574448000

O -6.638308000 -0.494591000 -0.607667000

C -8.084977000 -0.393327000 -0.611343000

C -8.677879000 -0.925898000 0.682837000

H -8.366102000 0.648007000 -0.777778000

H -8.389590000 -0.992195000 -1.470156000

H -8.363482000 -0.312268000 1.528259000

H -9.769912000 -0.901760000 0.625891000

H -8.364350000 -1.958354000 0.854580000

C 6.206470000 0.055103000 -0.006578000

C 7.216367000 0.888569000 -0.472002000

C 8.459809000 0.268999000 -0.197001000

C 8.190614000 -0.927287000 0.436320000

H 7.067037000 1.825049000 -0.985362000

H 9.440008000 0.648352000 -0.438904000

H 8.851198000 -1.685944000 0.823593000

H 6.830598000 -1.052556000 0.535728000

H 6.357842000 -1.796230000 1.021979000
